# Supplementary material
Source: MDPI journal article supplement (https://www.mdpi.com/2225-1154/12/5/57)
Supplement: s1 [file s1 › climate-2915167-supplementary.pdf]

## Supplementary Material

### Interview Questions

1. Introduction Questions
  - 1.1 How long have you lived in Ebor?
  - 1.2 What are some of the nice things about here?
  - 1.3 Would you call your community a close community? Why/why not?
2. Questions about bushfires:
  - 2.1 Tell me about your experiences in the 2019-2020 fires
  - 2.2 When the 2019-2020 bushfires first happened how did this impact:
    - Your household?
    - Your community?
  - 2.3 When you think about the bushfires what are your worries:
    - over the next month or so?
    - over the next couple of years?
  - 2.4 Australia has a long history of bushfires. Was the 2019-2020 bushfires the first time you have been impacted by bushfires?
  - 2.5 Why do you think are some of the causes for the 2019 – 2020 bushfires?
3. Questions about physical preparedness
  - 3.1 What do you do at your house/property to prevent bushfires or bushfire damage?
  - 3.2 What did the community do to prevent bushfires or bushfire damage?
  - 3.3 Since the 2019-2020 bushfires have you prepared your house/property for future bushfires? If so, how?
  - 3.4 If you were to rate your preparedness from 0 (not at all prepared) to 10 (very prepared), how prepared do you think you are for future bushfires? Why did you give that number?
  - 3.5 Is there anything else you have thought about doing to help prepare for future bushfires?
  - 3.6 Are there any things that make it hard or impossible for you to prepare?
4. Questions about psychological preparedness
  - 4.1 How might someone mentally prepare for a disaster? What would this look like?
  - 4.2 Do you think that you were mentally prepared for the 2019-2020 bushfires? If so, how did you prepare (mentally—if required)?
  - 4.3 Since the 2019-2020 bushfires have you taken steps to mentally prepare for future disasters? If yes, please describe?
  - 4.4 Are there other ways you could be mentally prepared for future fires?
5. Questions about mental health
  - 5.1 What is mental health?
  - 5.2 Do you think that mental health is important? Why/Why not?
  - 5.3 Do you think your community understands mental health? Why/Why not?
  - 5.4 What is the most stressful thing the community is experiencing at the moment?
  - 5.5 When the 2019-2020 bushfires happened, what was the most stressful thing for the community?
  - 5.6 Does worry about the 2019-2020 bushfires get in the way of the community preparing for future bushfires? If yes, how so?
  - 5.7 Does worry about the 2019-2020 bushfires get in the way of you preparing for future bushfires? If yes, how so?
  - 5.8 What do you do when you are stressed? What did you do when you were stressed about the 2019-2020 bushfires (if you were stressed)?
  - 5.9 What does the community do when they are stressed?

- 5.10 What did the community do when they were stressed about the 2019-2020 bushfires?
- 5.11 What makes someone go and talk to a therapist?
- 5.12 What help did you need following the 2019-2020 bushfires?
- 5.13 What (if anything) made it hard for you to get help following the 2019-2020 bushfires?

6. Questions about community

- 6.1 Who do most people turn to for support in your community (e.g. family, friends, religious figures, community leaders, etc.)?
- 6.2 After the bushfires, did members of the community help each other? If yes, please provide examples of ways in which the community was especially helpful/came together after the bushfires
- 6.3 Do you think there are vulnerabilities within the community (areas or groups that are at higher risk of the negative impacts of bushfires)?
- 6.4 Are there any positive changes that you saw within the community after the 2019-2020 bushfires?

7. Questions about climate

- 7.1 Have you noticed any other changes in the environment over the last couple of years (e.g. changes in weather patterns)?
  - 6.1 If yes, what do you think is the reason for this?
  - 6.2 What does the phrase 'climate change' mean to you?
  - 6.3 Do you think that the 2019-2020 bushfires and climate change are linked in any way?
  - 6.4 If you accept climate change is occurring, what do you put this down to?
  - 6.5 Do you believe there is any way to reduce the impacts of climate change?

8. Questions about intervention

- 8.1 What suggestions do you have to support people struggling with the 2019-2020 bushfires?
- 8.2 What do you think should be included in a bushfire intervention program that targets mental health and preparedness?
- 8.3 Who should facilitate the intervention?
- 8.4 Who do you think would attend the intervention?
- 8.5 How long should the intervention go for?
- 8.6 What do you think will help people engage in a bushfire prevention program?
- 8.7 What would be a good way to let people know about a bushfire prevention program?
